# Supplementary material for: Metal/graphene nanocomposites synthesized with the aid of supercritical fluid for promoting hydrogen release from complex hydrides
Source: Royal Society of Chemistry journal article supplement (doi:10.1039/c4nr03357d), 2014-08-07
Supplement: c4nr03357d1.pdf [file c4nr03357d1.pdf]

## Supporting Information

### **Metal/graphene nanocomposites synthesized with aid of supercritical fluid for promoting hydrogen release from complex hydrides**

*De-Hao Jiang, Cheng-Hsien Yang, Chuan-Ming Tseng, Sheng-Long Lee, Jeng-Kuei Chang\**

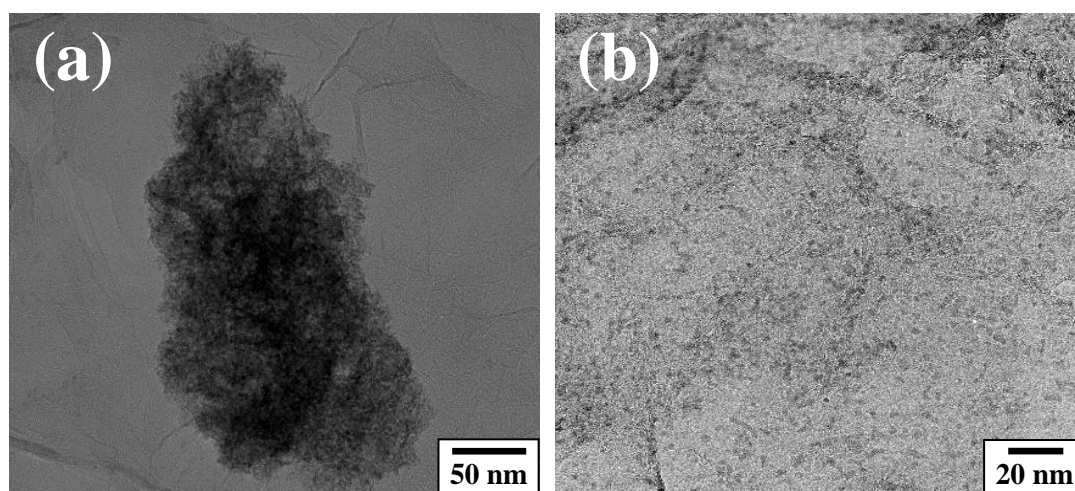

**Figure S1.** TEM bright-field images of Ni/GNS composites synthesized (a) without and (b) with SCCO<sub>2</sub>.

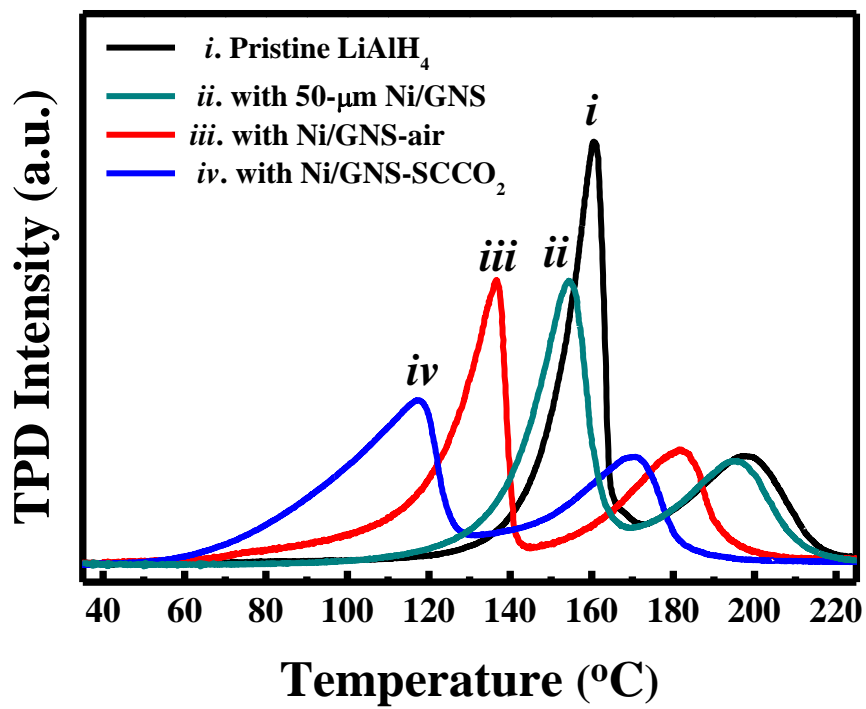

**Figure S2.** TPD signals of LiAlH<sub>4</sub> without and with 2.5 wt.% of various additives.

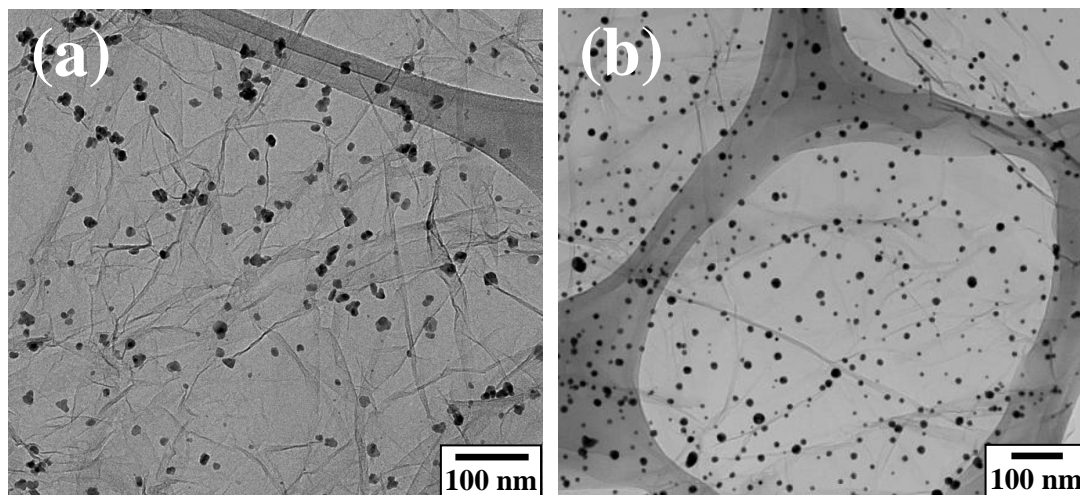

**Figure S3.** TEM micrographs of (a) Pd/GNS and (b) Au/GNS composites synthesized with  $\text{SCCO}_2$ .

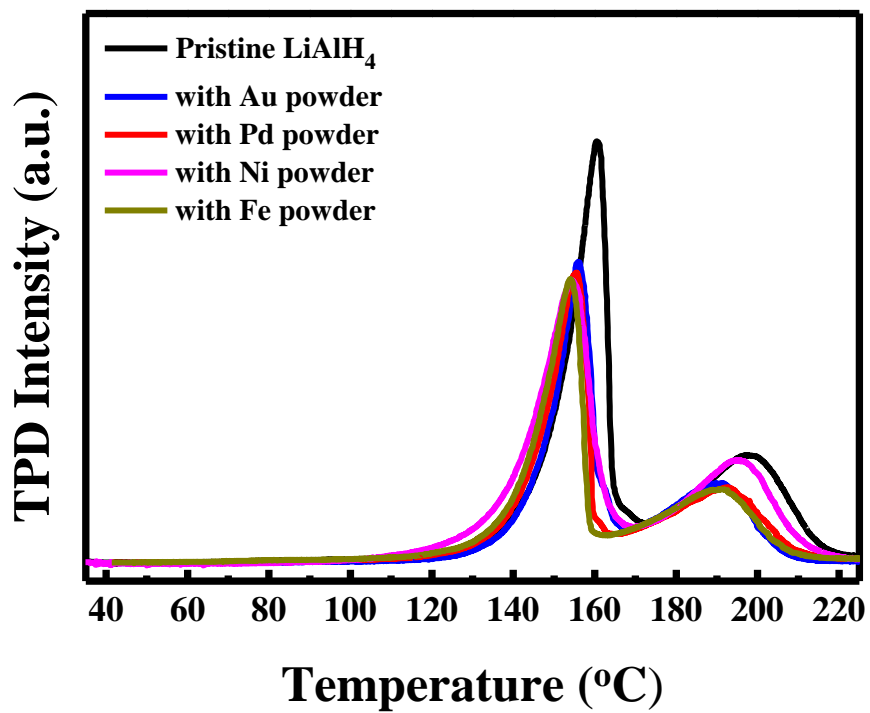

**Figure S4.** TPD signals of LiAlH<sub>4</sub> without and with 2.5 wt.% of micron-scale Fe, Ni, Pd, and Au powder.

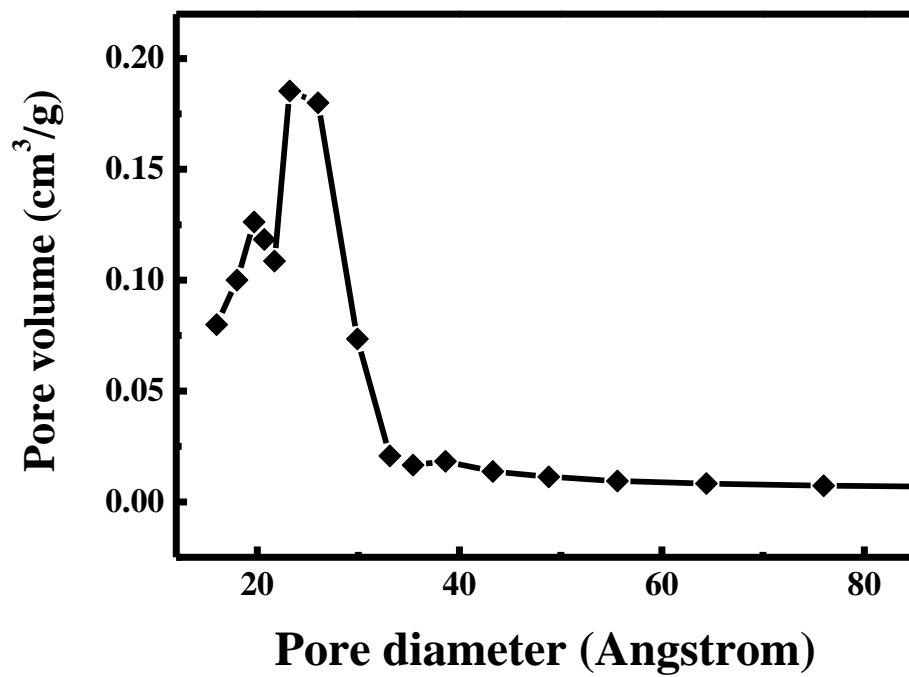

**Figure S5.** Pore size distribution of AC calculated from the nitrogen adsorption isotherm using a Barrett–Joyner–Halenda (BJH) method.

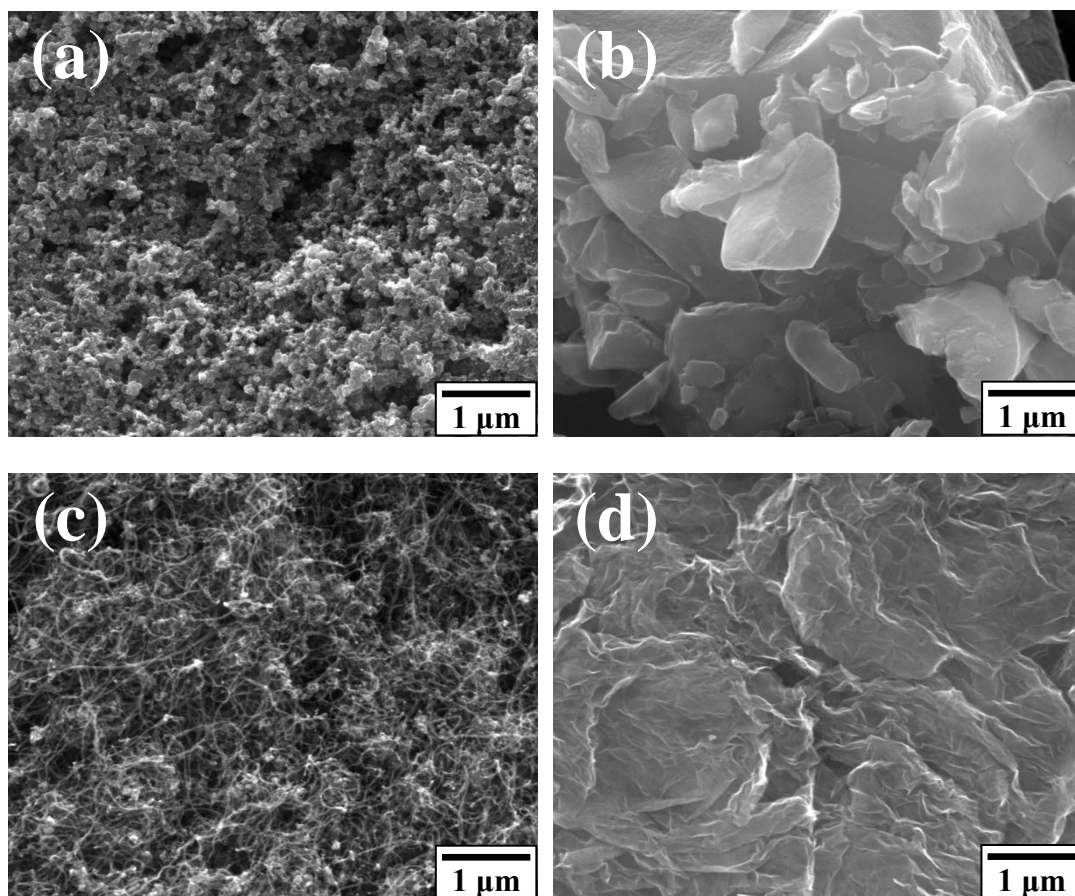

**Figure S6.** SEM micrographs of (a) AC, (b) CB, (c) CNTs, and (d) GNSs.
